# Supplementary material for: Simulation of long-term spatiotemporal variations in regional-scalegroundwater recharge: Contributions of a water budget approach insouthern Quebec
Source: Copernicus journal article supplement (doi:10.5194/hess-2021-71), 2021-02-26

Fig. 1 will be modified as follows:

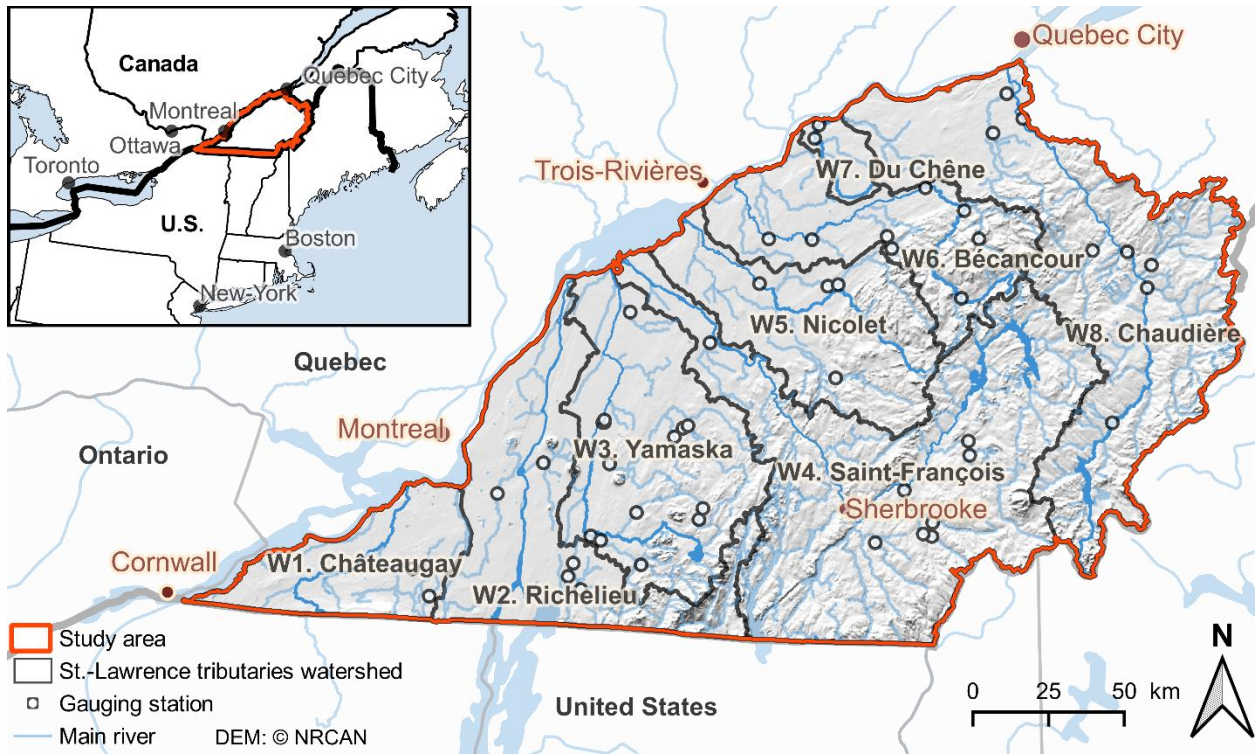

Fig. 4 will be modified as follows:

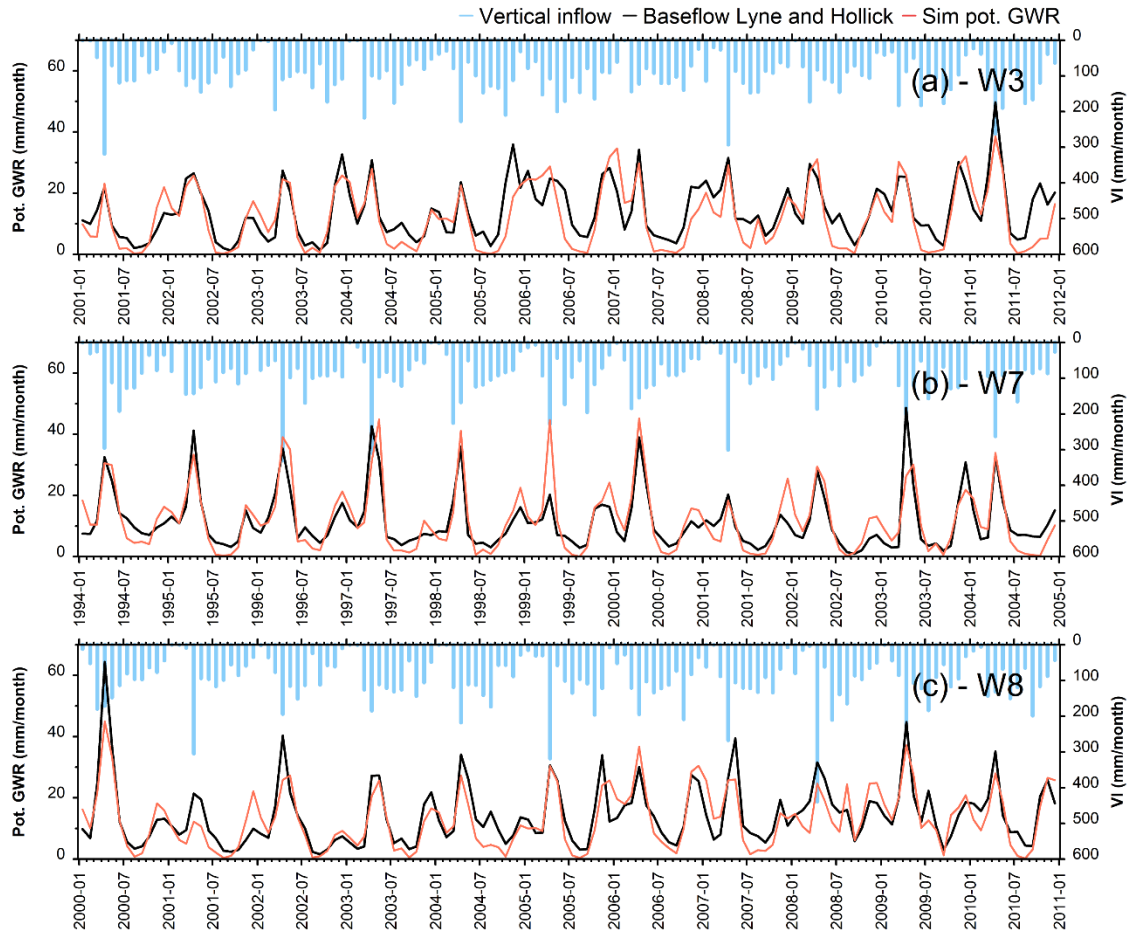

Supplement: Supplementary file [file hess-2021-71-AC1-supplement.pdf]
